# Supplementary material
Source: publisher figshare collection journal article supplement (https://acs.figshare.com/ndownloader/files/11188055)
Supplement: Supplementary file 1 [file 11188055]

Supporting information

**AIE-active Polyamide Containing Diphenylamine-TPE Moiety with Superior Electrofluorochromic Performance**

*Ningwei Sun,<sup>†</sup> Kaixin Su,<sup>†</sup> Ziwei Zhou,<sup>‡</sup> Ye Yu,<sup>§</sup> Xuzhou Tian,<sup>†</sup> Daming Wang,<sup>†\*</sup> Xiaogang Zhao,<sup>†</sup> Hongwei Zhou<sup>†</sup> and Chunhai Chen<sup>†\*</sup>*

<sup>†</sup> Key Laboratory of High Performance Plastics (Jilin University), Ministry of Education, National & Local Joint Engineering Laboratory for Synthesis Technology of High Performance Polymer, College of Chemistry, Jilin University, Changchun 130012, PR China

<sup>‡</sup> State Key Lab of Supramolecular Structure and Materials, College of Chemistry, Jilin University, Changchun 130012, PR China

<sup>§</sup> Leibniz Institut für Polymerforschung Dresden e.V, Institute of Physical Chemistry and Polymer Physics, Hohe Str. 6, D-01069, Dresden, Germany

\* Email: [wangdaming@jlu.edu.cn](mailto:wangdaming@jlu.edu.cn); [cch@jlu.edu.cn](mailto:cch@jlu.edu.cn)

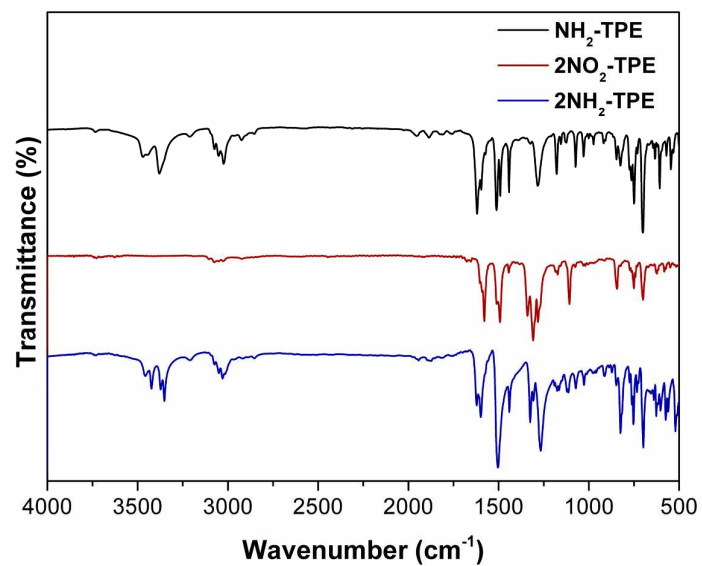

**Figure S1** FTIR spectra of the synthesized monomers NH<sub>2</sub>-TPE, 2NO<sub>2</sub>-TPE and 2NH<sub>2</sub>-TPE.

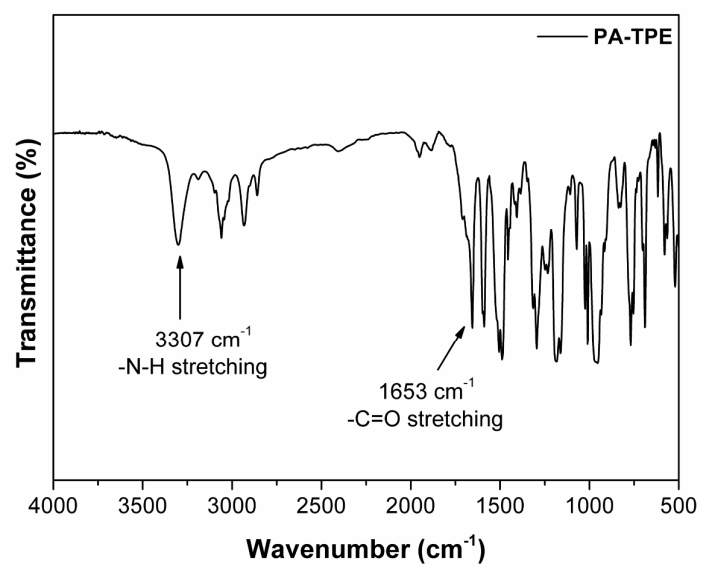

**Figure S2** FTIR spectrum of the polyamide PA-TPE.

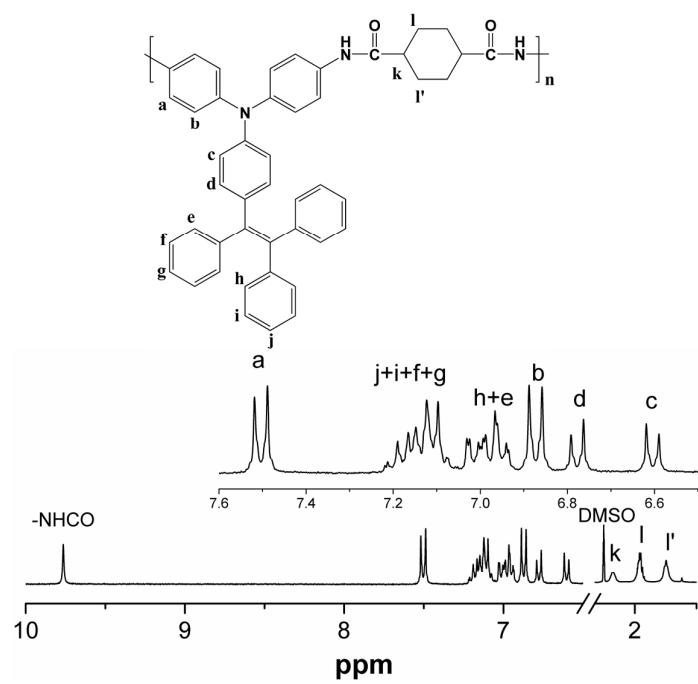

**Figure S3**  $^1\text{H}$  NMR spectrum of the polyamide PA-TPE.

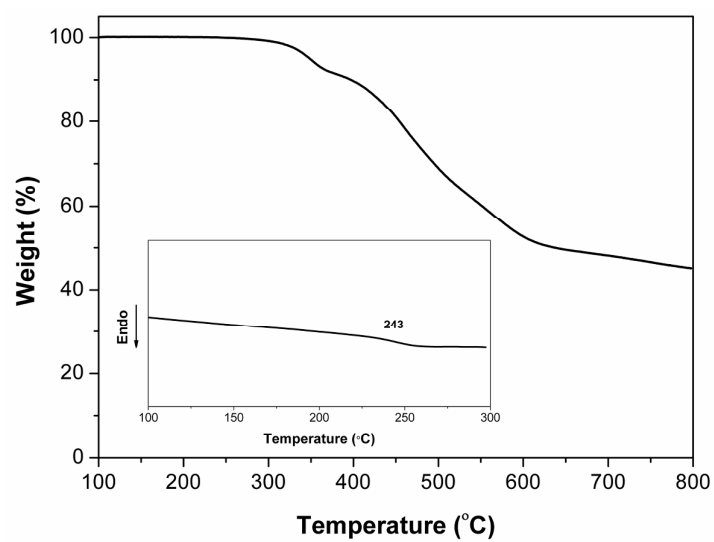

**Figure S4** TGA and DSC (inset) curves of the polyamide PA-TPE.

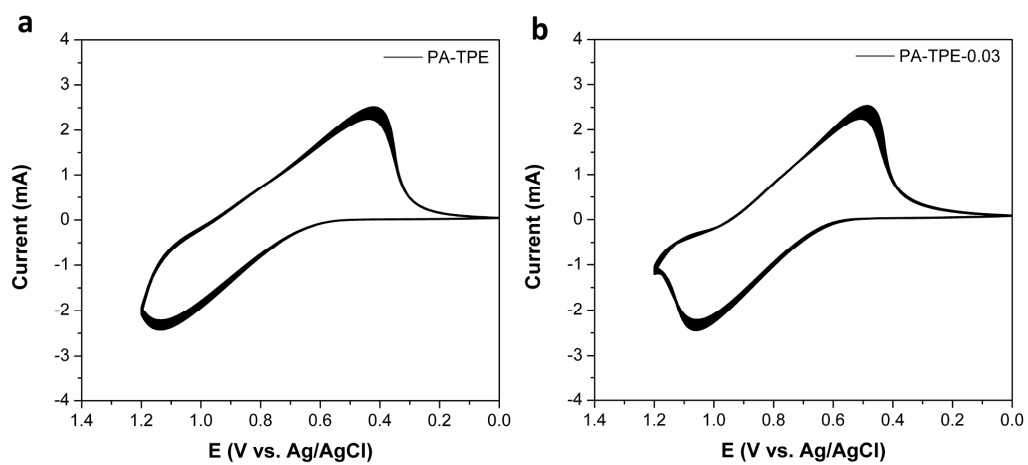

**Figure S5** CV diagrams of PA-TPE (a) and PA-TPE-0.03 (b) at a scan rate of 100 mV/s for 100 cycles.

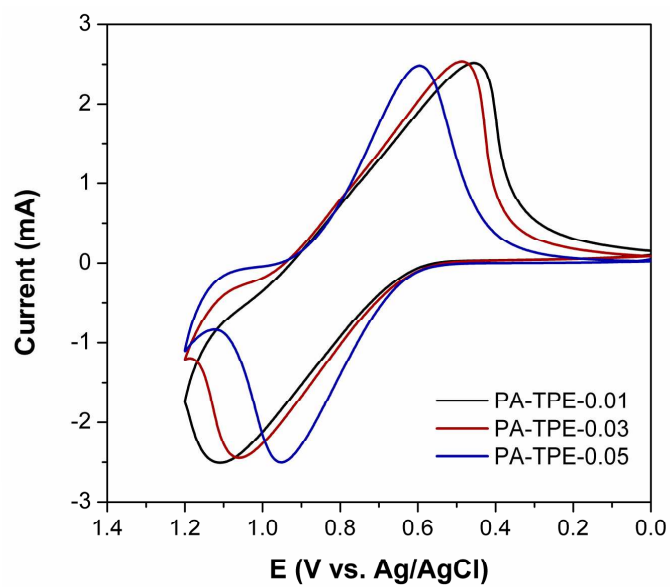

**Figure S6** CV diagrams of PA-TPE-0.01, PA-TPE-0.03 and PA-TPE-0.05 containing TBAP at a scan rate of 100 mV/s.

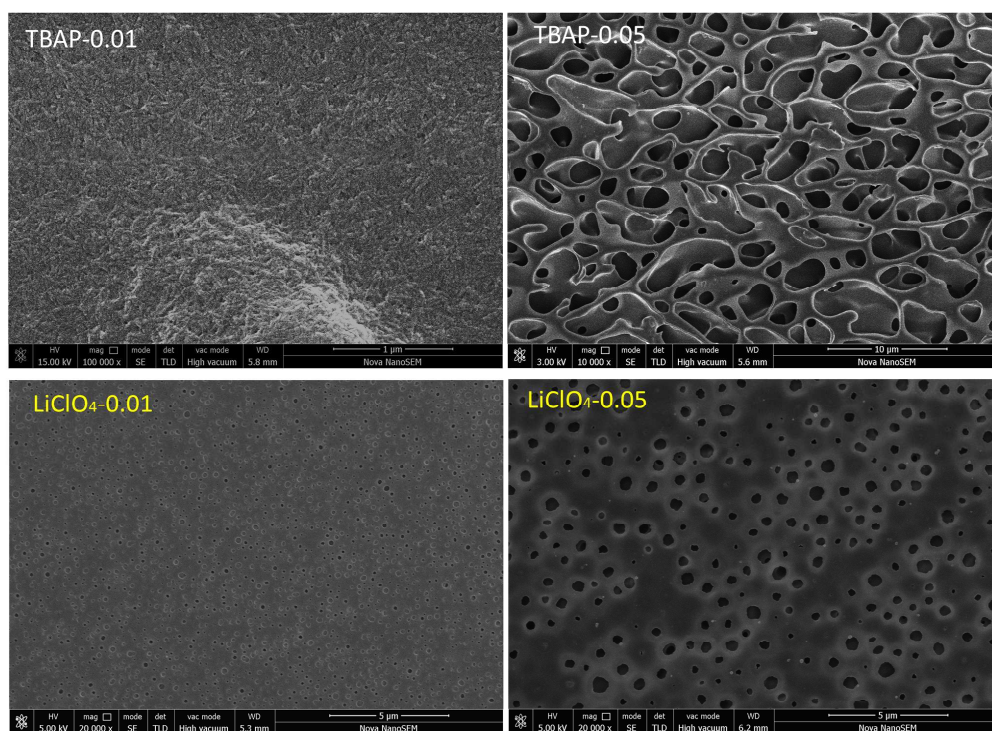

**Figure S7** SEM images of PA-TPE-0.01 and PA-TPE-0.05 containing electrolyte salts TBAP and LiClO<sub>4</sub>, respectively.



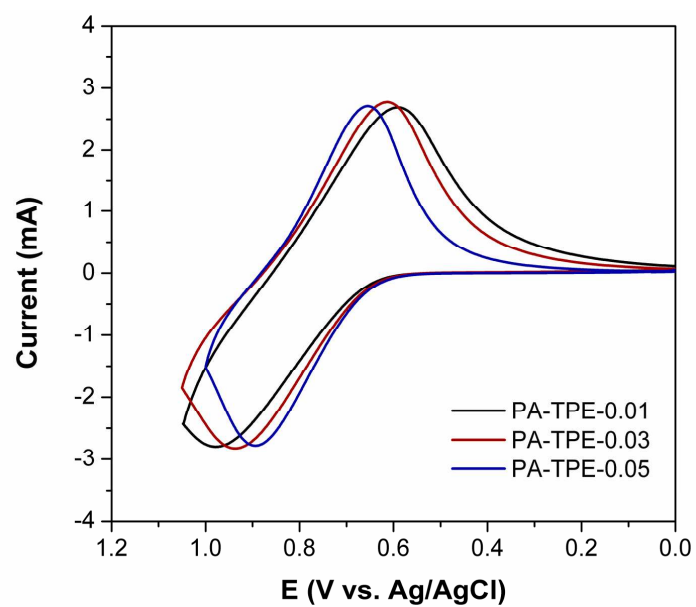

**Figure S8** CV diagrams of PA-TPE-0.01', PA-TPE-0.03' and PA-TPE-0.05' containing  $\text{LiClO}_4$  at a scan rate of 100 mV/s.

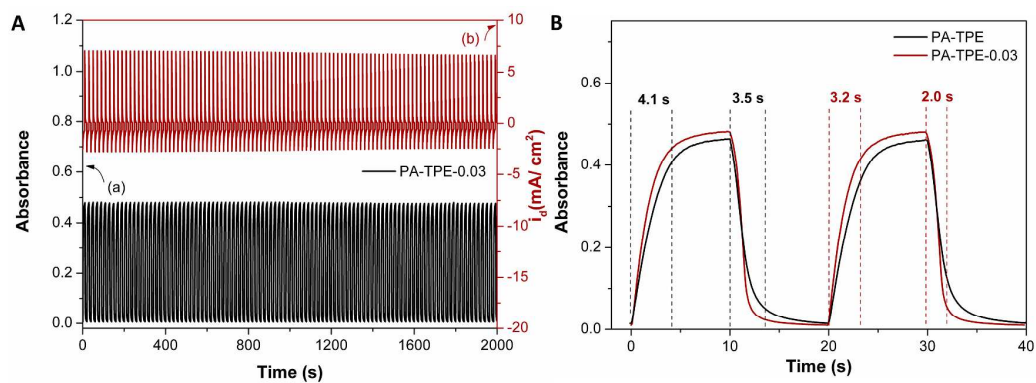

**Figure S9** (A) EC switching of PA-TPE-0.03 thin film electrode between 0 V and 1 V: (a) absorbance changes and (b) current consumption at the monitored wavelength of 408 nm. (B) Switching time comparison of PA-TPE and PA-TPE-0.03.

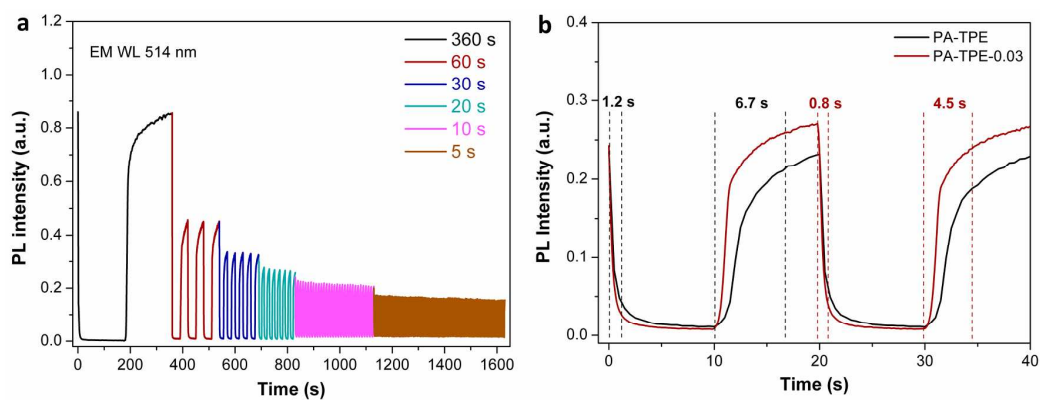

**Figure S10** (a) EFC switching of PA-TPE-0.03 thin film electrode under applied potentials between 0 V and 1 V with duration time set as 360 s, 60 s, 30 s, 20 s, 10 s, 5 s. (b) EFC switching time comparison of PA-TPE and PA-TPE-0.03.

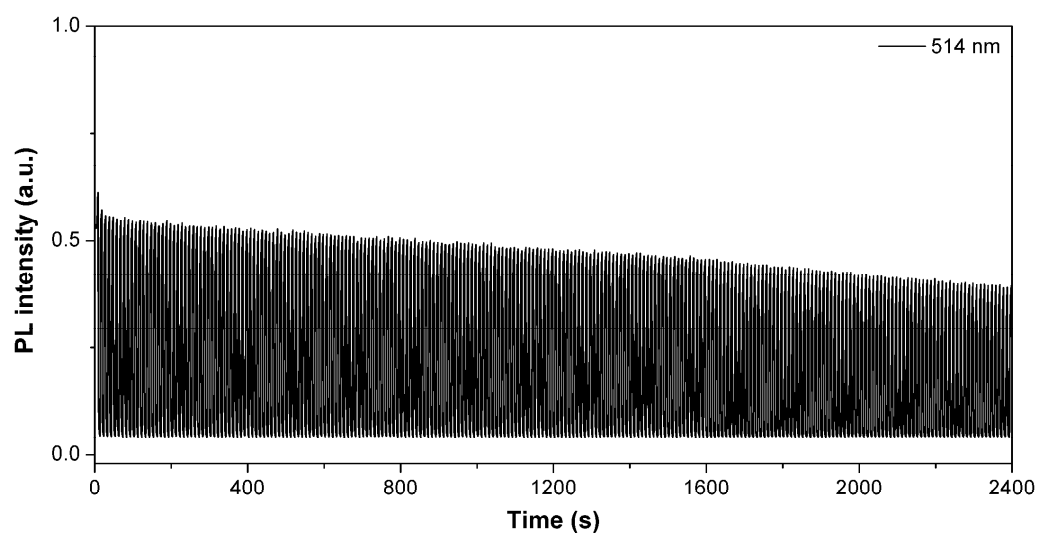

**Figure S11** EFC switching of PA-TPE-0.03 thin film electrode under applied potentials between 0 V and 1 V with duration time set as 10 s,

**Table S1** Inherent Viscosities, Molecular Weights and Solubilities of the polymers.

| Sample        | $\eta_{\text{inh}}$ (dL/<br>g) <sup>a</sup> | GPC <sup>b</sup> |       |      | Solvents <sup>c</sup> |      |     |      |     |                   |                    |
|---------------|---------------------------------------------|------------------|-------|------|-----------------------|------|-----|------|-----|-------------------|--------------------|
|               |                                             | $M_w$            | $M_n$ | PDI  | NMP                   | DMAc | DMF | DMSO | THF | CHCl <sub>3</sub> | CH <sub>3</sub> CN |
| <b>PA-TPE</b> | 1.27                                        | 63100            | 46000 | 1.37 | ++                    | ++   | ++  | ++   | +-  | --                | --                 |

<sup>a</sup> Inherent viscosity was measured at a concentration of 0.5 g/ dL in DMAc at 25°C; <sup>b</sup> Relative to polystyrene standard, using DMF as the eluent; <sup>c</sup> Qualitative solubilities were tested with 10 mg of polymers in 1mL of solvent. ++, soluble at room temperature; +-, partially soluble; --, insoluble even on heating.

**Table S2** Optical and electrochemical properties of the polyamide PA-TPE.

| polymer       | Solution (nm) <sup>a</sup> |                        |                              | Film (nm)     |             |                        |                              | Oxidation Potential (V) |                        |
|---------------|----------------------------|------------------------|------------------------------|---------------|-------------|------------------------|------------------------------|-------------------------|------------------------|
|               | Abs.<br>max                | PL<br>max <sup>b</sup> | $\Phi_F$<br>(%) <sup>c</sup> | Abs.<br>onset | Abs.<br>max | PL<br>max <sup>b</sup> | $\Phi_F$<br>(%) <sup>c</sup> | $E_{\text{onset}}$      | $E_{1/2}$ <sup>d</sup> |
| <b>PA-TPE</b> | 315                        | 511                    | 1.77                         | 441           | 314         | 514                    | 69.1                         | 0.61                    | 0.77                   |

<sup>a</sup> The polymer concentration was  $10^{-5}$  mol/L in NMP. <sup>b</sup> They were excited at the Abs<sub>max</sub> for the solution states. <sup>c</sup> The quantum yield was tested by using a calibrated integrating sphere. <sup>d</sup>  $E_{1/2}$  (Average potential of the redox couple peaks).
